# Supplementary material for: How emulsified droplets induce the bursting of suspended films of liquid mixtures
Source: Royal Society of Chemistry journal article supplement (doi:10.1039/d4sm00240g), 2024-01-01
Supplement: d4sm00240g1.pdf [file d4sm00240g1.pdf]

## Supplementary Information, Delance et al.

June 3, 2024

### 1 Emulsion microdroplet radius evolution over time

Within the emulsion, emulsified microdroplets coalesce through a diffusion limited process [?]. The microdroplet radius has been measured over time using Dynamic Light Scattering for the three PDMS grades. Results are shown in Fig.1.

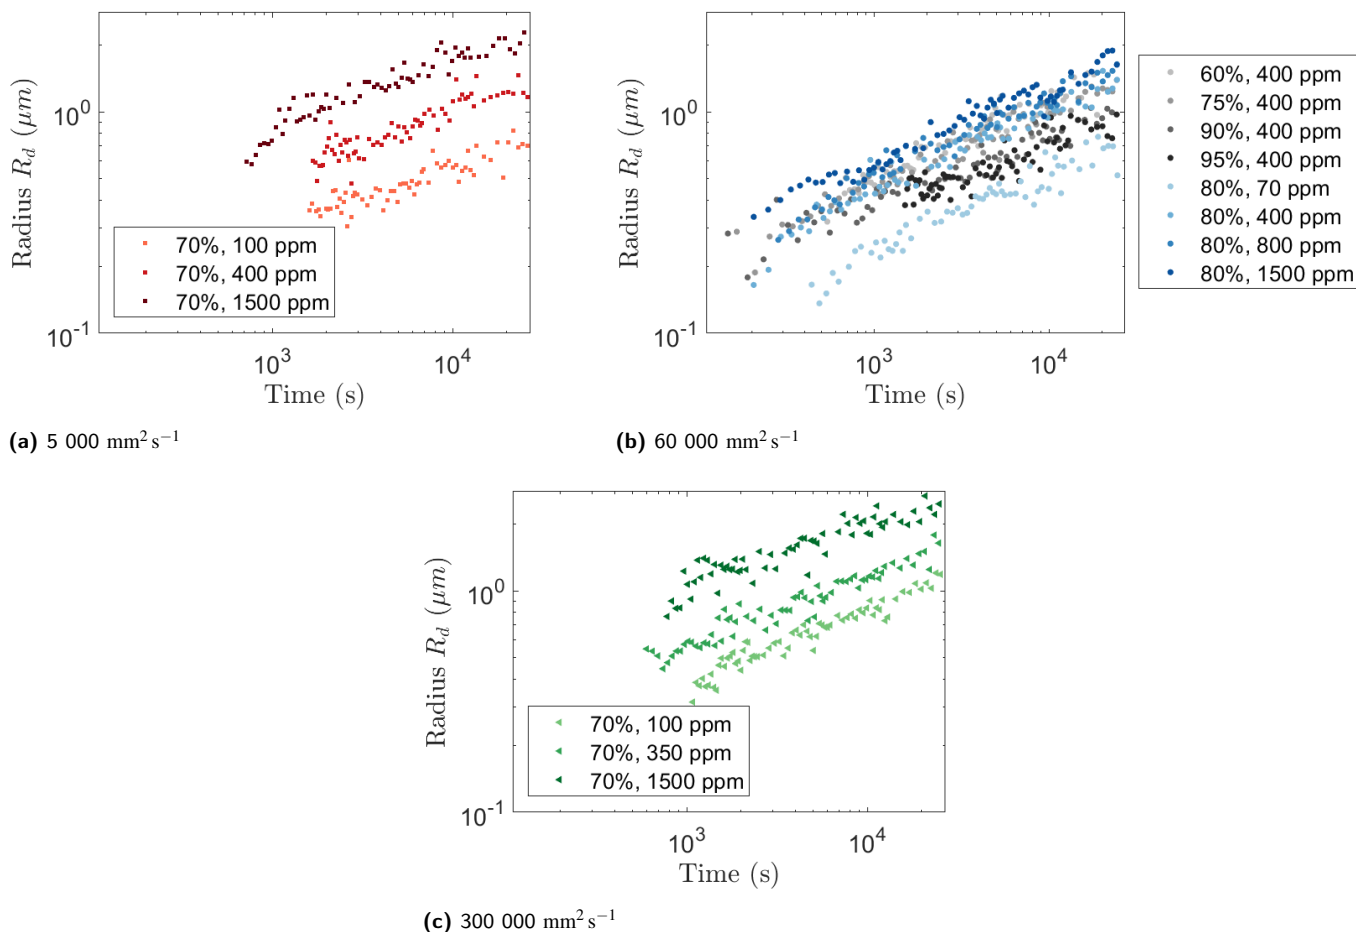

**Figure 1** Droplet radius evolution over time for the three PDMS grades. Legend: mass fraction in cyclopentanol (%) and mass fraction in PDMS (ppm).  $1\text{ ppm} = 10^{-6}\text{ kg/kg}$ .

In a previous work (Delance *et al.*, *Soft Matter*, 2022) we rationalized the mechanism by which the microdroplets diffuse by brownian motion in the continuous phase until they coalesce so that the evolution of their mean radius  $R_d$  follows the equation:

$$R_d \simeq R_0 \left( \frac{t}{\tau_c} \right)^{1/3} . \quad (1)$$

with

$$\tau_c = \frac{2\pi\eta_c R_0^3}{k_B T \phi} , \quad (2)$$

where  $R_0$  is the radius of the droplets at time  $t = 0$  of mixing the three liquids,  $\eta_c$  the viscosity of the continuous liquid phase,  $k_B T$  the thermal energy, and  $\phi$  is the droplet volume fraction. In Fig.2, we plot the measured radius against the radius that we can calculate using these equations. We find that all data collapse on a master curve, which confirms our hypothesis that the radius of the microdroplets increases due to coalescence. This result holds for the three different PDMS grades.

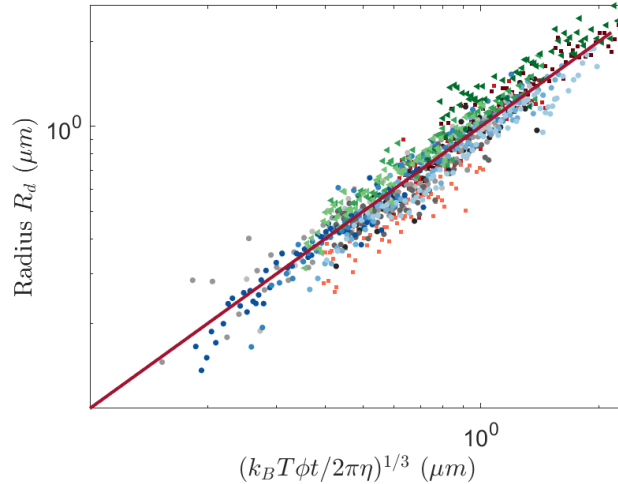

**Figure 2** Measured radius as a function of the theoretical radius computed using Eq. 1 and 2 for the three PDMS grades.

## 2 Dispersed phase composition and viscosity as a function of the PDMS grade

In this section, we measure the composition and viscosity of the dispersed phase. We first separate the dispersed phase from the continuous one. To do so, we wait for the microdroplets to sediment at the bottom of the vial and we then simply extracted this phase with a syringe. We then measure the composition by infrared spectroscopy

In Table 1, we present the composition of the dispersed phase as a function of PDMS grade. The uncertainty on the measurements is  $\pm 2\%$ . The composition slightly varies depending on the PDMS grade by less than 6%. Thus, we consider that the changes in the composition of the dispersed phase depending on the PDMS grade do not affect the thin film experiments.

| PDMS viscosity    | 5000 mm <sup>2</sup> s <sup>-1</sup> | 60000 mm <sup>2</sup> s <sup>-1</sup> | 300000 mm <sup>2</sup> s <sup>-1</sup> |
|-------------------|--------------------------------------|---------------------------------------|----------------------------------------|
| PDMS (%)          | 60                                   | 66                                    | 59                                     |
| Cyclopentanol (%) | 17                                   | 11                                    | 17                                     |
| Decane (%)        | 23                                   | 23                                    | 24                                     |

**Table 1** Droplet composition for different PDMS viscosities. (mass fraction in %)

The viscosity of the dispersed phase was then measured using a rheometer (TA DHR3, cone-plane geometry). We note that due to the composition and the presence of decane and cyclopentanol, the droplet viscosity is lower than the initial PDMS viscosity. The results for the three PDMS grades are presented in Table 2.

|                                                                |       |        |        |
|----------------------------------------------------------------|-------|--------|--------|
| Molar mass (g mol <sup>-1</sup> )                              | 49350 | 116000 | 204000 |
| Kinematic viscosity of PDMS (mm <sup>2</sup> s <sup>-1</sup> ) | 5000  | 60000  | 300000 |
| Dynamic viscosity of PDMS (Pas)                                | 4.87  | 59     | 294    |
| Dynamic viscosity of the droplets (Pas)                        | 0.3   | 6      | 27     |

**Table 2** Newtonian viscosity of the droplets depending on the PDMS grade

Note that for the largest grades, shear thinning is measured starting from a shear rate of 500 s<sup>-1</sup> and 1 s<sup>-1</sup> respectively. The viscosity of the continuous phase  $\eta_c$  was also measured with a rheometer (Low Shear 400, Lamy rheology). We found  $\eta_c = 3.5 \cdot 10^{-3}$  Pa.s.

### 3 Histograms of lifetimes versus observed mechanisms

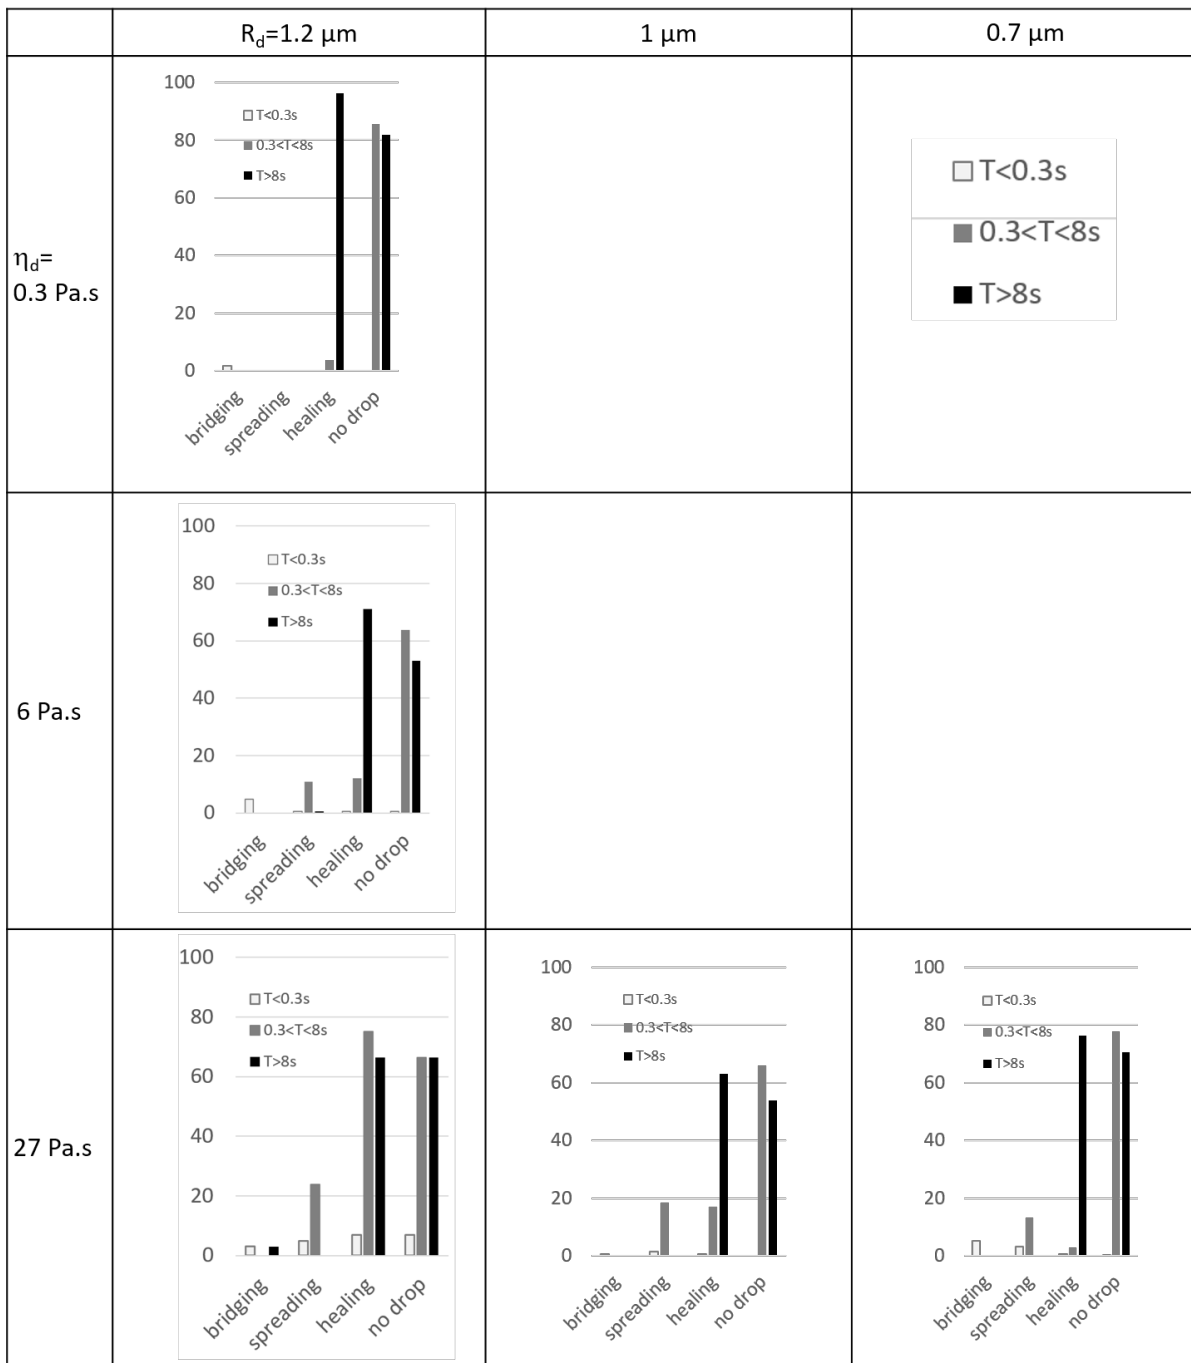

**Figure 3** Histograms of lifetimes as a function of the observed mechanism for different emulsion droplet size  $R_d$  and dispersed phase Newtonian shear viscosity  $\eta_d$ . "spreading" corresponds to cases where a local thinning is observed that leads to bursting. The occurrence of 'spreading' increases with the dispersed phase viscosity and the droplet radius. 'healing' and 'no drop' are predominant when the microdroplets are inefficient at inducing film bursting (low viscosity and low droplet size). 'bridging' is rare in all cases and corresponds to the shortest lifetimes.
